# Supplementary material for: Effect of the Microstructure of Composite CoMoS/Carbon Catalysts on Hydrotreatment Performances
Source: MDPI journal article supplement (doi:10.3390/catal13050862), 2023-05-09
Supplement: s1 [file s1]

Archive with 1 entries (1 files):
- catalysts-2366052-supplementary.pdf
